# Supplementary material for: The role of structural parameters in DNA cyclization
Source: PubMed Central journal article supplement (PMC4743258; doi:10.1186/s12859-016-0897-9), 2016-02-04
Supplement: 12859_2016_897_MOESM2_ESM.pdf [file 12859_2016_897_MOESM2_ESM.pdf]

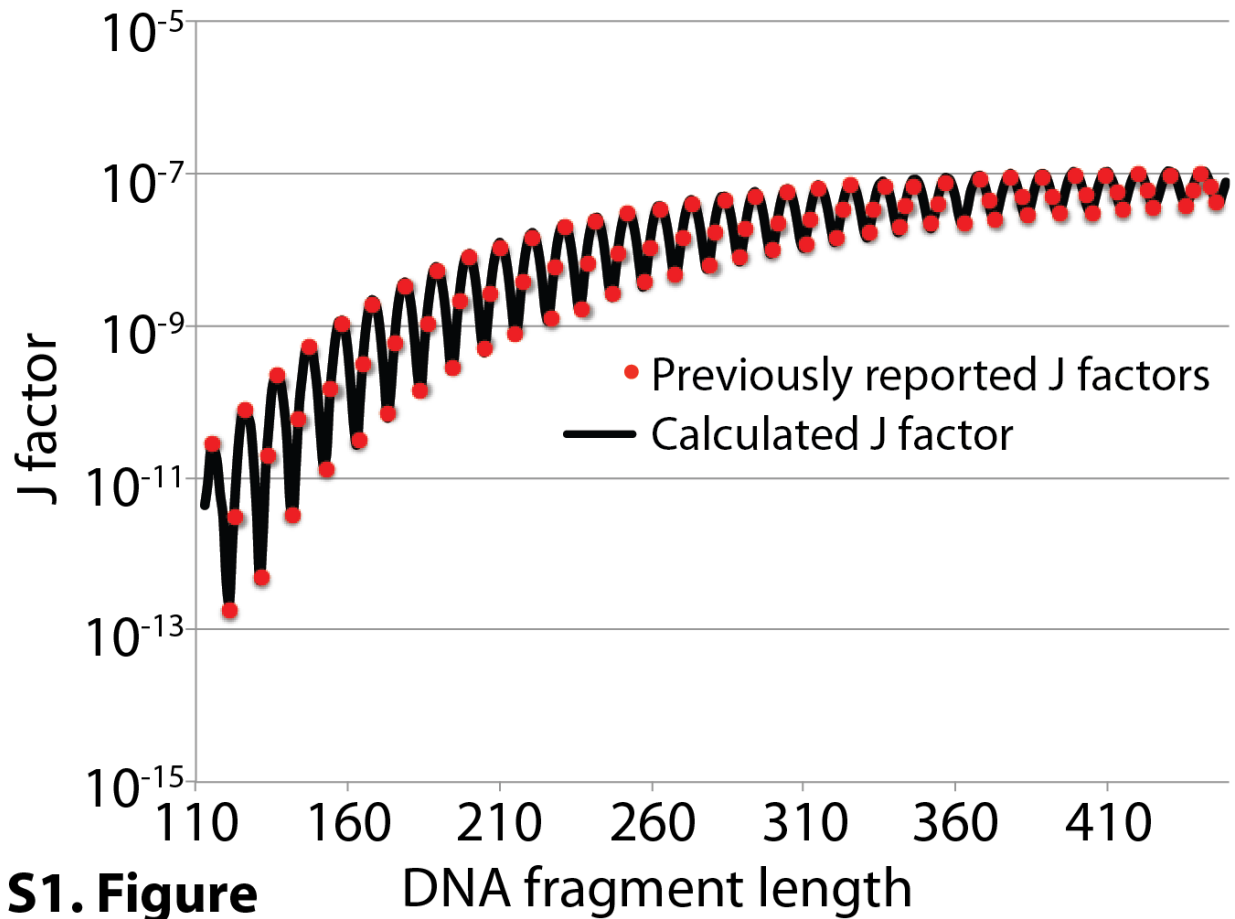

**S1. Figure** DNA fragment length

Figure S1. Validation of the CSO implementation using the model of a straight homogenous DNA sequence. Black line corresponds to calculated J factors, while red circles are used to show J factors based on results reported in ref. (29). The Y-axis depicts J factors (log scaled), while the X-axis reflects the length of the DNA fragment.
