# Supplementary material for: The role of structural parameters in DNA cyclization
Source: PubMed Central journal article supplement (PMC4743258; doi:10.1186/s12859-016-0897-9), 2016-02-04
Supplement: 12859_2016_897_MOESM4_ESM.pdf [file 12859_2016_897_MOESM4_ESM.pdf]

## Additional file 4. Illustrative working MATLAB implementation of the code for the model of straight DNA.

```
%% Starting a clean session without any variables and initiating random number generator
clear all;
clc;
rng(1234613717); % init random generator with the same seed

%% Model parameters for a mononucleotide sequence (i.e., XXXXX...)
% Average values (in radians and nanometers)
avg_tilt = 0.000000000; % 0.000000000 [radians] == 0.000000000 [degrees]
avg_roll = 0.000000000; % 0.000000000 [radians] == 0.000000000 [degrees]
avg_twist = 0.598298867; % 0.598298867 [radians] == 34.280000000 [degrees]

avg_shift = 0.000000000; % 0.000000000 [angstrom] == 0.000000000 [nanometers]
avg_slide = 0.000000000; % 0.000000000 [angstrom] == 0.000000000 [nanometers]
avg_rise = 3.400000000; % 3.400000000 [angstrom] == 0.340000000 [nanometers]

% Standard deviations (in radians and nanometers)
std_tilt = 0.084473935; % 0.084473935 [radians] == 4.840000000 [degrees]
std_roll = 0.084473935; % 0.084473935 [radians] == 4.840000000 [degrees]
std_twist = 0.071383966; % 0.071383966 [radians] == 4.090000000 [degrees]

std_shift = 0.141421356; % 0.141421356 [angstrom] == 0.0141421356 [nanometers]
std_slide = 0.141421356; % 0.141421356 [angstrom] == 0.0141421356 [nanometers]
std_rise = 0.141421356; % 0.141421356 [angstrom] == 0.0141421356 [nanometers]

% Sequence params and thresholds for hits
Q = 0.7604; % normalization factor
base_pairs = 211; % integer number of XXXXX... bases (mononucleotide sequence)
tresh_r = 30.000000000; % 30.000000000 [angstrom] == 3.000000000 [nanometers]
tresh_deg30 = 0.86602540378; % cos(30 [degrees]) = sqrt(3)/2 = 0.86602540378

%% Performing Monte Carlo calculations
Pr = 0; Ptr = 0; Ptw = 0; % initializing hit counts

for MC_iter = 1 : 5*10^15 % performing 5*10^15 Monte Carlo iterations

    for base_index = 1 : base_pairs % looping the basepairs in the sequence

        % Generating normally distributed random numbers with normrnd
        % normrnd is a MATLAB program, where normrnd(mu,sigma)
        % generates random numbers from the normal distribution
        % with mean parameter mu and standard deviation parameter sigma
        tilt_angle = normrnd( avg_tilt, std_tilt );
        roll_angle = normrnd( avg_roll, std_roll );
        twist_angle = normrnd( avg_twist, std_twist );

        shift = normrnd( avg_shift, std_shift );
        slide = normrnd( avg_slide, std_slide );
        rise = normrnd( avg_rise, std_rise );

        % Angle calculations
        if ( (tilt_angle==0) && ( roll_angle == 0 ) ) % MATLAB cannot handle atan2(zero divided by zero)
            phase_angle = 0.000000000;
        else
            phase_angle = atan2( tilt_angle / roll_angle );
        end

        net_bend_angle = sqrt( tilt_angle^2 + roll_angle^2 );
```

```

% Matrix and vector calculations
% roty and rotz are MATLAB functions for rotation matrices along y and z, respectively
Tn    = rotz( twist_angle/2 - phase_angle ) * roty( net_bend_angle ) * rotz( twist_angle/2 + phase_angle );
Tn_half = rotz( twist_angle/2 - phase_angle ) * roty( net_bend_angle/2 ) * rotz( phase_angle );
rn     = Tn_half * [shift; slide; rise];

if ( base_index == 1 ) % first base in the sequence: init An
    An = [ Tn, rn; 0 0 0 1];
else % next bases in the sequence: multiply An to the previous values
    An = An * [ Tn, rn; 0 0 0 1];
end

end

if ( sqrt(An(1,4)^2 + An(2,4)^2 + An(3,4)^2) < tresh_r )
    Pr = Pr + 1;

    if ( abs( An(3,3) ) > tresh_deg30 )
        Ptr = Ptr + 1;

        Tn = An(1:3, 1:3);
        trace_Tn = trace(Tn);

        if ( abs( (trace_Tn - Tn(3,3)) / (1 + Tn(3,3)) ) > tresh_deg30 )
            Ptw = Ptw + 1;
        end
    end

end

end

end

Jfactor = Ptw / (5*10^15 * Q);

```
